# Supplementary material
Source: PubMed Central journal article supplement (PMC3037756)
Supplement: blood-2010-06-291245_1.pdf [file blood-2010-06-291245_1.pdf]

# B

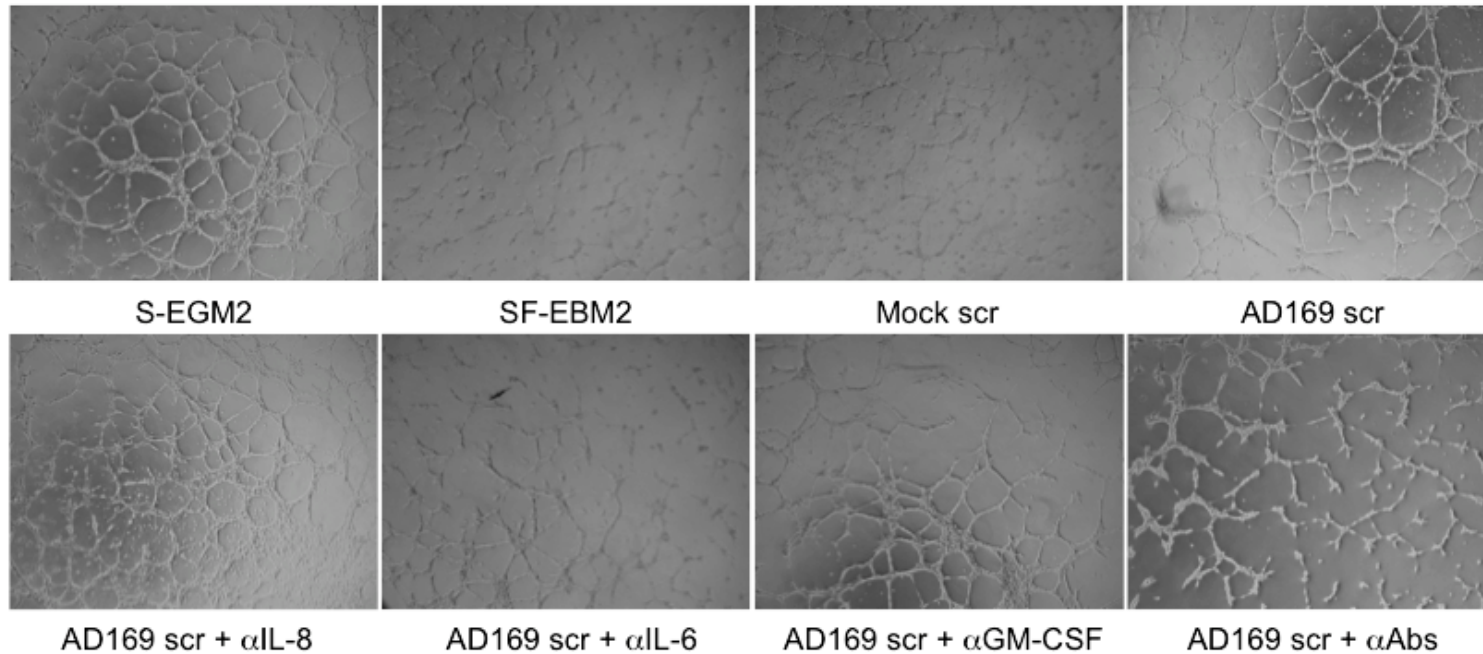

**Figure S1. Neutralization of IL-6 decreases angiogenesis.** (A) Quantification of matrigel tubule formation after 24 h in the presence of mock secretome (Mock scr), mock secretome with a non-related antibody (Mock scr + nrAb), mock secretome with anti-IL-6, anti-GM-CSF, and anti-IL-8/CXCL8 (Mock scr +  $\alpha$ Abs), HCMV AD169 secretome (AD169 scr), HCMV AD169 secretome with a non-related antibody (AD169 scr + nrAb), HCMV AD169 secretome with anti-IL-6 antibody (AD169 scr +  $\alpha$ IL-6), HCMV AD169 secretome with anti-GM-CSF antibody (AD169 scr +  $\alpha$ GM-CSF), HCMV AD169 secretome with anti-IL-8/CXCL8 antibody (AD169 scr +  $\alpha$ IL-8) and HCMV AD169 secretome with anti-IL-6, anti-GM-CSF, and IL-8/CXCL8 antibodies (AD169 scr +  $\alpha$ Abs). The results are expressed as mean  $\pm$  SD, ###  $P < 0.001$  vs mock, \*\*\* $P < 0.001$ , \*\* $P < 0.01$  vs HCMV AD169 secretome. (B) Representative examples of each culture conditions are shown as a low-power image (magnification, X10).

**A**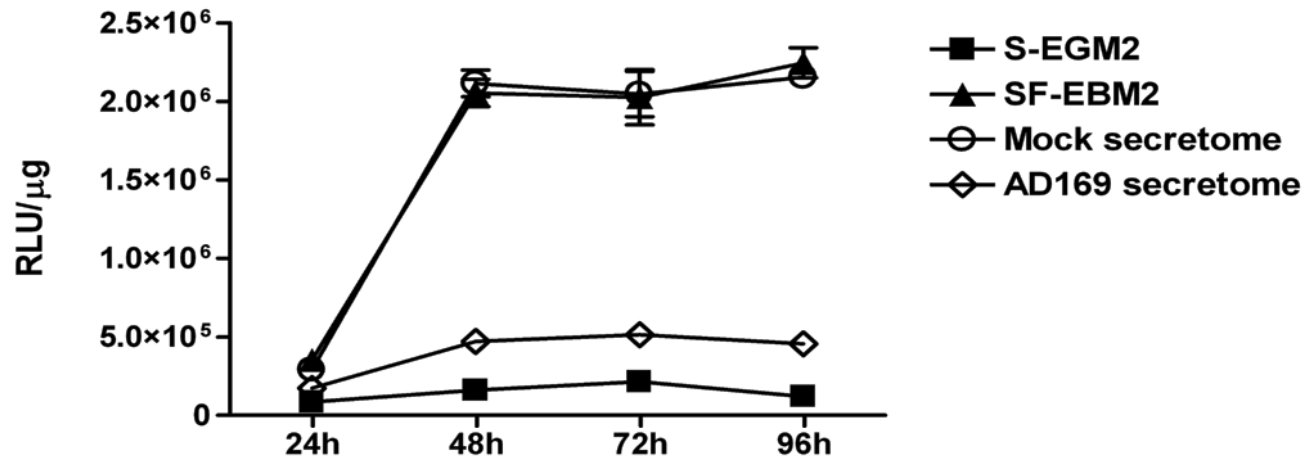**B**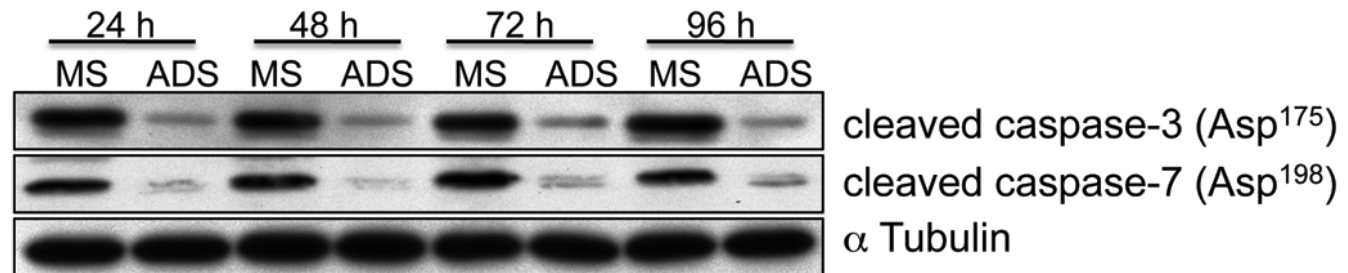

**Figure S2. HCMV secretomes decrease caspase 3 and 7 activity.** HUVEC cells were starved over-night and then stimulated with mock- or AD169- secretome during a time course analysis. (A) Caspase 3/7 activity measured using a Caspase-Glo assay kit (Promega). (B) Immunoblotting for cleaved caspase-3 and 7.
